## Correction

# Correction: The Functional Influences of Common ABCB1 Genetic Variants on the Inhibition of P-glycoprotein by *Antrodia cinnamomea* Extracts

The PLOS ONE Staff

## Notice of Republication

This article was republished on November 19, 2014, due to the release of confidential or copyrighted information. Please view the article again to download the corrected version.

## Reference

1. Sheu M-J, Teng Y-N, Chen Y-Y, Hung C-C (2014) The Functional Influences of Common ABCB1 Genetic Variants on the Inhibition of P-glycoprotein by *Antrodia cinnamomea* Extracts. PLoS ONE 9(2): e89622. doi:10.1371/journal.pone.0089622

**Citation:** The PLOS ONE Staff (2014) Correction: The Functional Influences of Common ABCB1 Genetic Variants on the Inhibition of P-glycoprotein by *Antrodia cinnamomea* Extracts. PLoS ONE 9(12): e116132. doi:10.1371/journal.pone.0116132

**Published:** December 19, 2014

**Copyright:** © 2014 The PLOS ONE Staff. This is an open-access article distributed under the terms of the Creative Commons Attribution License, which permits unrestricted use, distribution, and reproduction in any medium, provided the original author and source are credited.
